# Supplementary material for: Rumen Microbiota Predicts Feed Efficiency of Primiparous Nordic Red Dairy Cows
Source: MDPI journal article supplement (doi:10.3390/microorganisms11051116), 2023-04-25
Supplement: s1 [file s1]

**Table S1.** Mean ( $\pm$  standard deviation) composition of the experimental feeds during years 2018 - 2020.

|                                | Grass silage     | Concentrate mix  |                             |
|--------------------------------|------------------|------------------|-----------------------------|
|                                |                  | Feeding station  | Milking parlor <sup>1</sup> |
| n                              | 46               | 41               | 41                          |
| Dry matter (DM), g/kg          | 271.3 $\pm$ 34.9 | 878.0 $\pm$ 6.2  | 878.2 $\pm$ 6.8             |
| In DM, g/kg                    |                  |                  |                             |
| Ash                            | 80.1 $\pm$ 12.6  | 73.1 $\pm$ 2.4   | 75.1 $\pm$ 2.9              |
| Crude protein                  | 149.1 $\pm$ 14.8 | 205.2 $\pm$ 14.8 | 211.1 $\pm$ 13.6            |
| Crude fat                      |                  | 35.7 $\pm$ 7.7   | 30.1 $\pm$ 5.9              |
| NDF                            | 519.8 $\pm$ 42.1 | 232.7 $\pm$ 10.4 | 217.1 $\pm$ 14.2            |
| Fermentation quality, g/kg DM  |                  |                  |                             |
| pH                             | 4.13 $\pm$ 0.20  |                  |                             |
| Ammonia N, g/kg N              | 36.6 $\pm$ 9.3   |                  |                             |
| Lactic acid                    | 50.5 $\pm$ 23.4  |                  |                             |
| Acetic acid                    | 18.1 $\pm$ 3.9   |                  |                             |
| Propionic acid                 | 1.26 $\pm$ 1.3   |                  |                             |
| Butyric acid                   | 0.42 $\pm$ 0.67  |                  |                             |
| D-value <sup>2</sup> , g/kg DM | 681 $\pm$ 32.5   |                  |                             |
| ME <sup>3</sup> , MJ/kg DM     | 10.9 $\pm$ 0.52  | 12.0 $\pm$ 0.10  | 12.1 $\pm$ 0.16             |

<sup>1</sup>Milking parlor concentrate mix was given 600 g/d.

<sup>2</sup>In vitro digestible organic matter, g/kg dry matter.

<sup>3</sup>Metabolizable energy.

**Table S2.** Mean ( $\pm$  standard deviation) feed and nutrient intake from calving to rumen sampling of the cows sampled during the different years.

|                         | Sampling year     |                   |                   |
|-------------------------|-------------------|-------------------|-------------------|
|                         | 2018              | 2019              | 2020              |
| n                       | 21                | 28                | 38                |
| Intake                  |                   |                   |                   |
| Dry matter, kg/d        | 19.5 $\pm$ 1.25   | 21.1 $\pm$ 1.88   | 19.7 $\pm$ 1.39   |
| Grass silage, kg DM/d   | 9.8 $\pm$ 0.72    | 11.2 $\pm$ 1.66   | 9.9 $\pm$ 0.99    |
| Concentrate, kg DM/d    | 9.7 $\pm$ 0.59    | 9.9 $\pm$ 0.45    | 9.8 $\pm$ 0.51    |
| Crude protein, kg/d     | 3.51 $\pm$ 0.21   | 3.79 $\pm$ 0.30   | 3.45 $\pm$ 0.22   |
| NDF <sup>1</sup> , kg/d | 7.34 $\pm$ 0.50   | 7.70 $\pm$ 0.82   | 7.72 $\pm$ 0.66   |
| ME <sup>2</sup> , MJ/d  | 214.4 $\pm$ 11.90 | 227.0 $\pm$ 17.91 | 214.1 $\pm$ 13.12 |

<sup>1</sup>Neutral detergent fiber.

<sup>2</sup>Metabolizable energy.

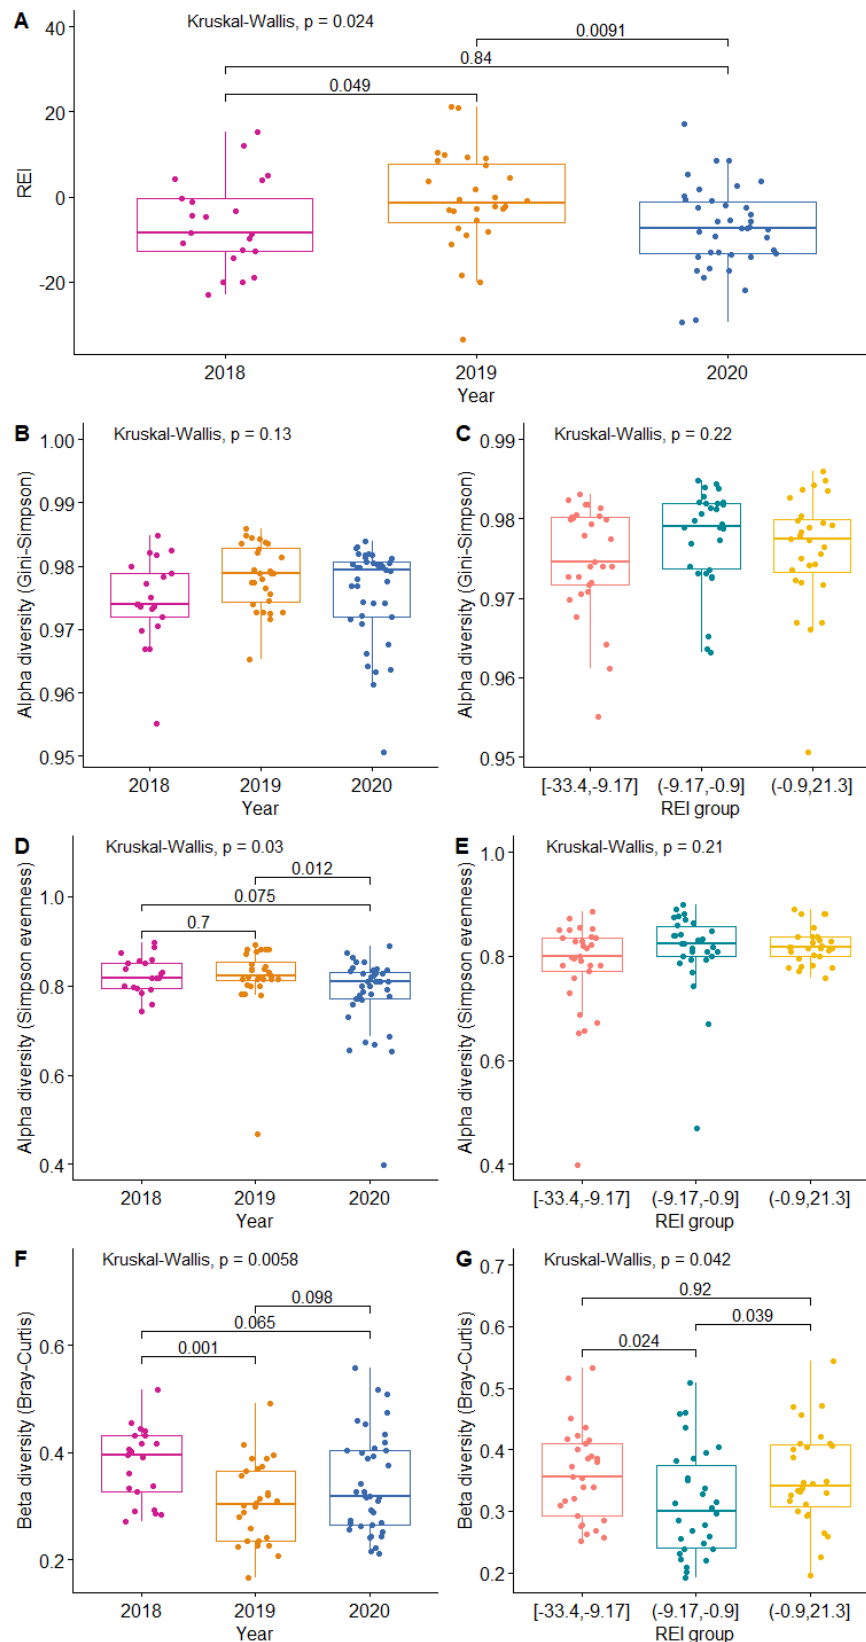

**Figure S1.** Box plots of feed efficiency and diversity per year and per REI group. A) REI, and B) Gini-Simpson, D) Simpson Evenness and F) Bray-Curtis beta diversity per year, and the diversities per REI groups in C, E, and G, respectively. Kruskal-Wallis test for the group effect and pairwise Wilcoxon test estimates indicated in the sub-figures.

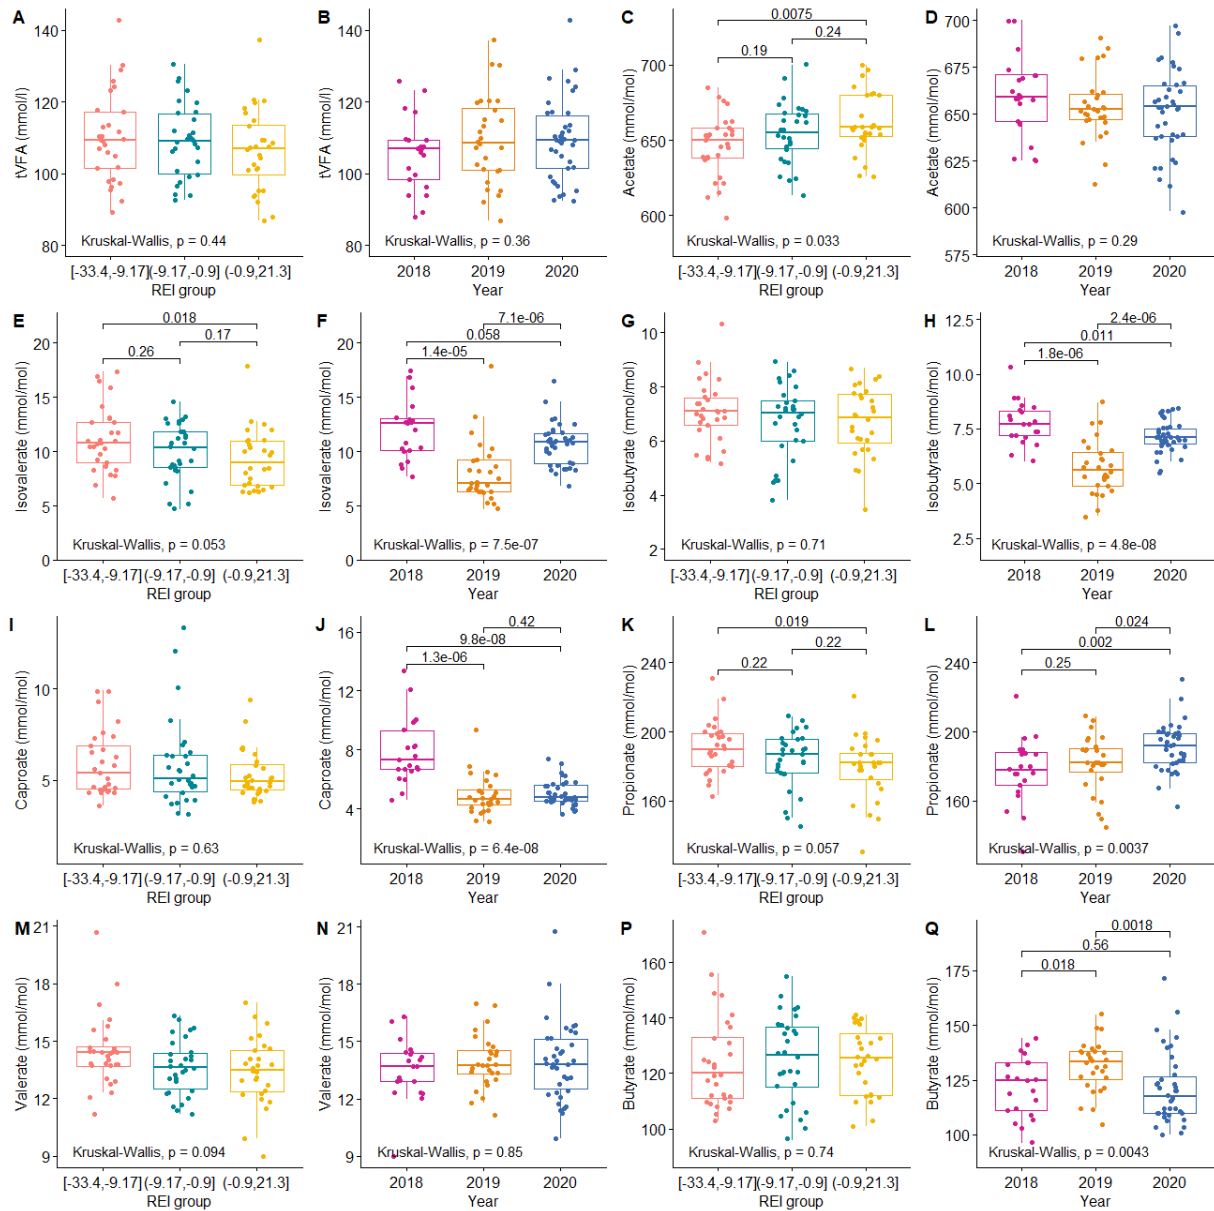

**Figure S2.** Box plot of volatile fatty acid data per year and per REI group. Total Volatile Fatty Acids (tVFA), Acetate, Isovalerate, Isobutyrate, Caproate, Propionate, Valerate, and Butyrate grouped according to REI tertiles and by year. Kruskal-Wallis test for the group effect and pairwise Wilcoxon test estimates indicated in the sub-figures.

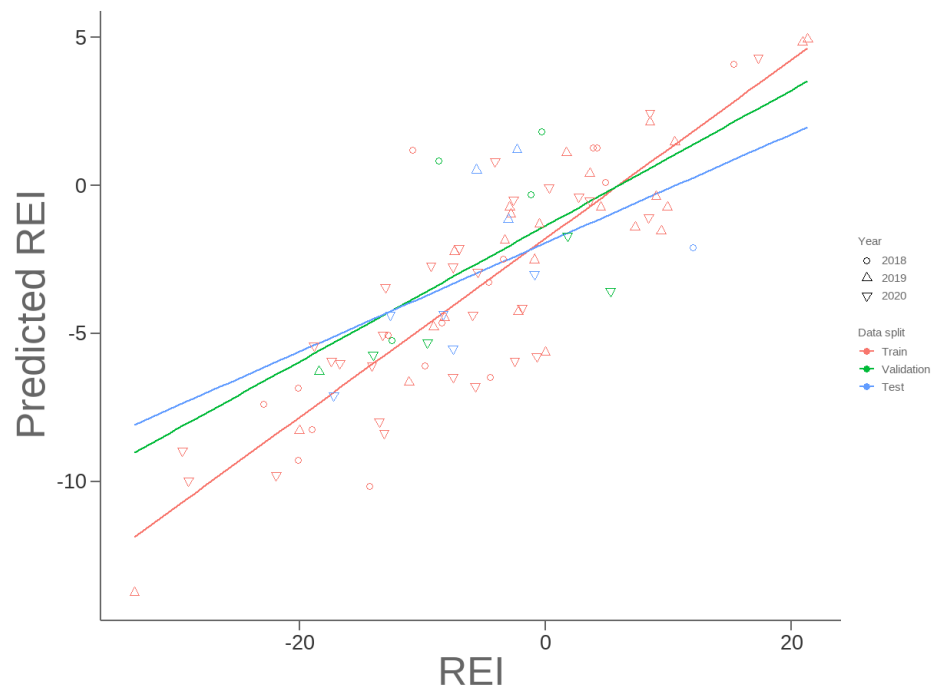

**Figure S3.** Correlation between phenotypically estimated Residual Energy Intake on the first 100 days in milk (REI) and the predicted REI values from the model. Correlations for train, validation and test data were 0.88, 0.60, and 0.55, respectively. The samples from different years do not show any systematic bias.

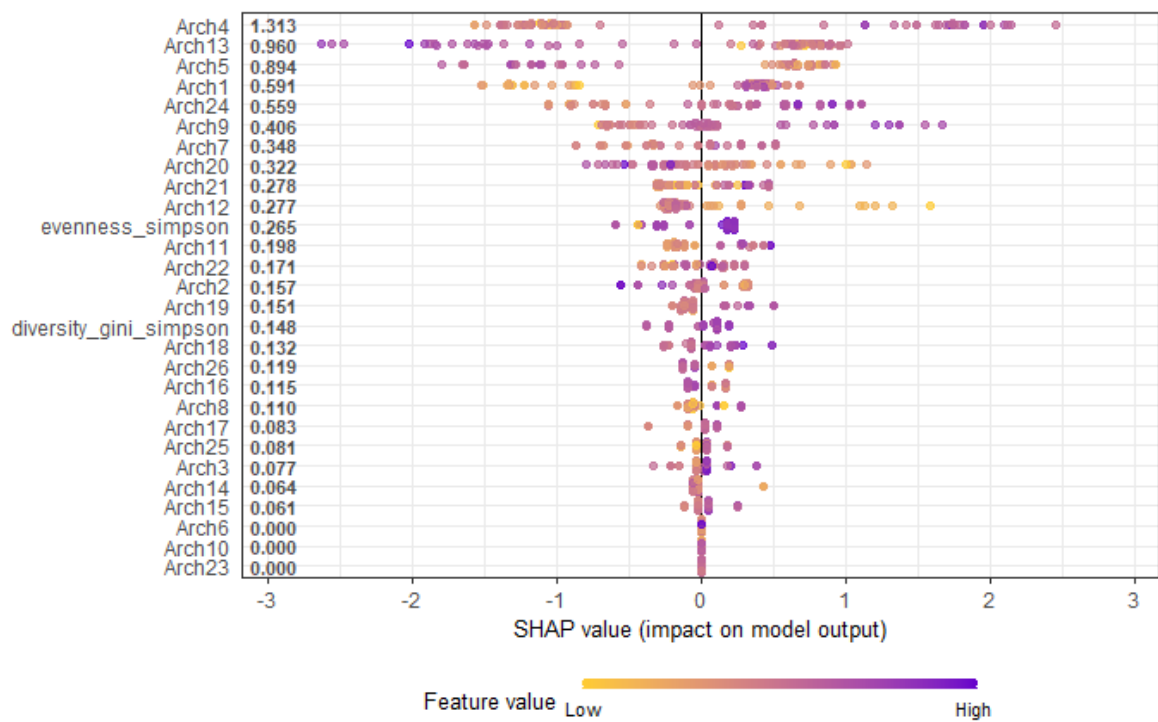

**Figure S4.** Shapley summary plot with predictors sorted in SHAP importance order from the most important (top) to least important (bottom). The X- axis indicates predictor impact in each sample, with coloring indicating low or high predictor values. The feature importance given next to the y-axis.

A

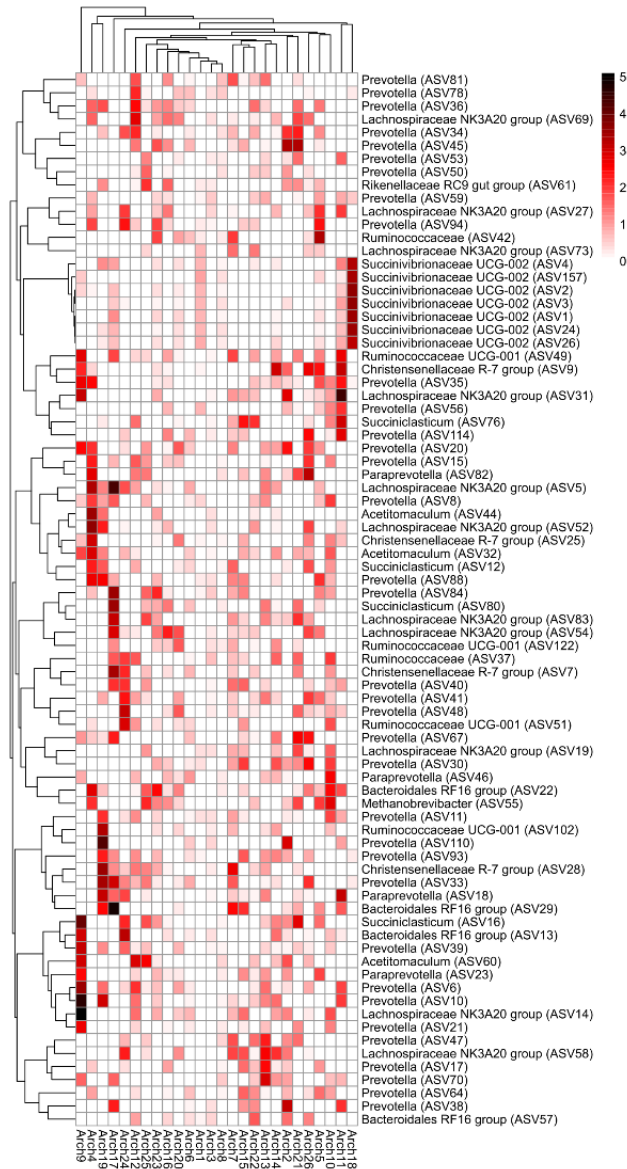

B

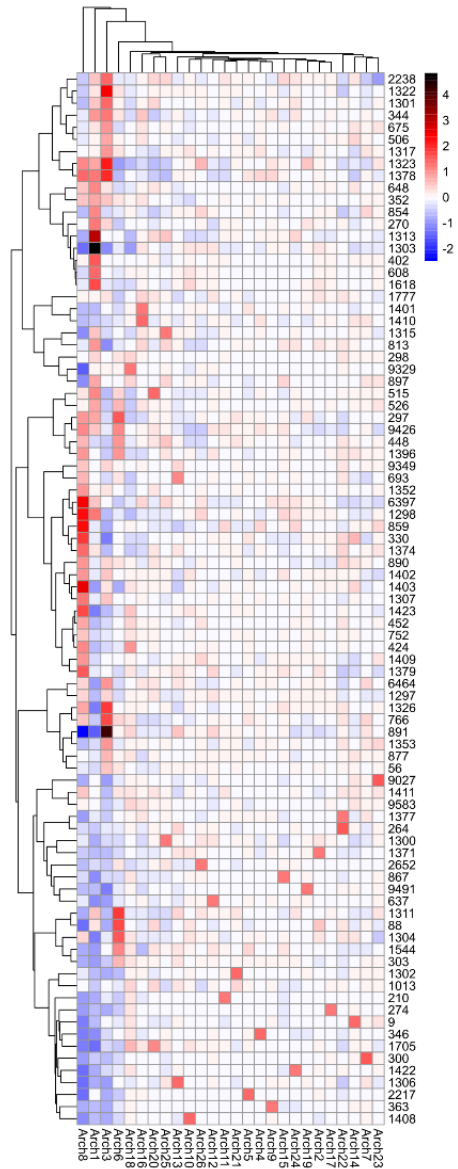

**Figure S5.** Heat maps for A) transposed Y matrix of the GLRM analysis indicating ASV abundance profile represented by each of the archetype components and for B) the X matrix of the GLRM analysis indicating archetype scores for each cow sample.

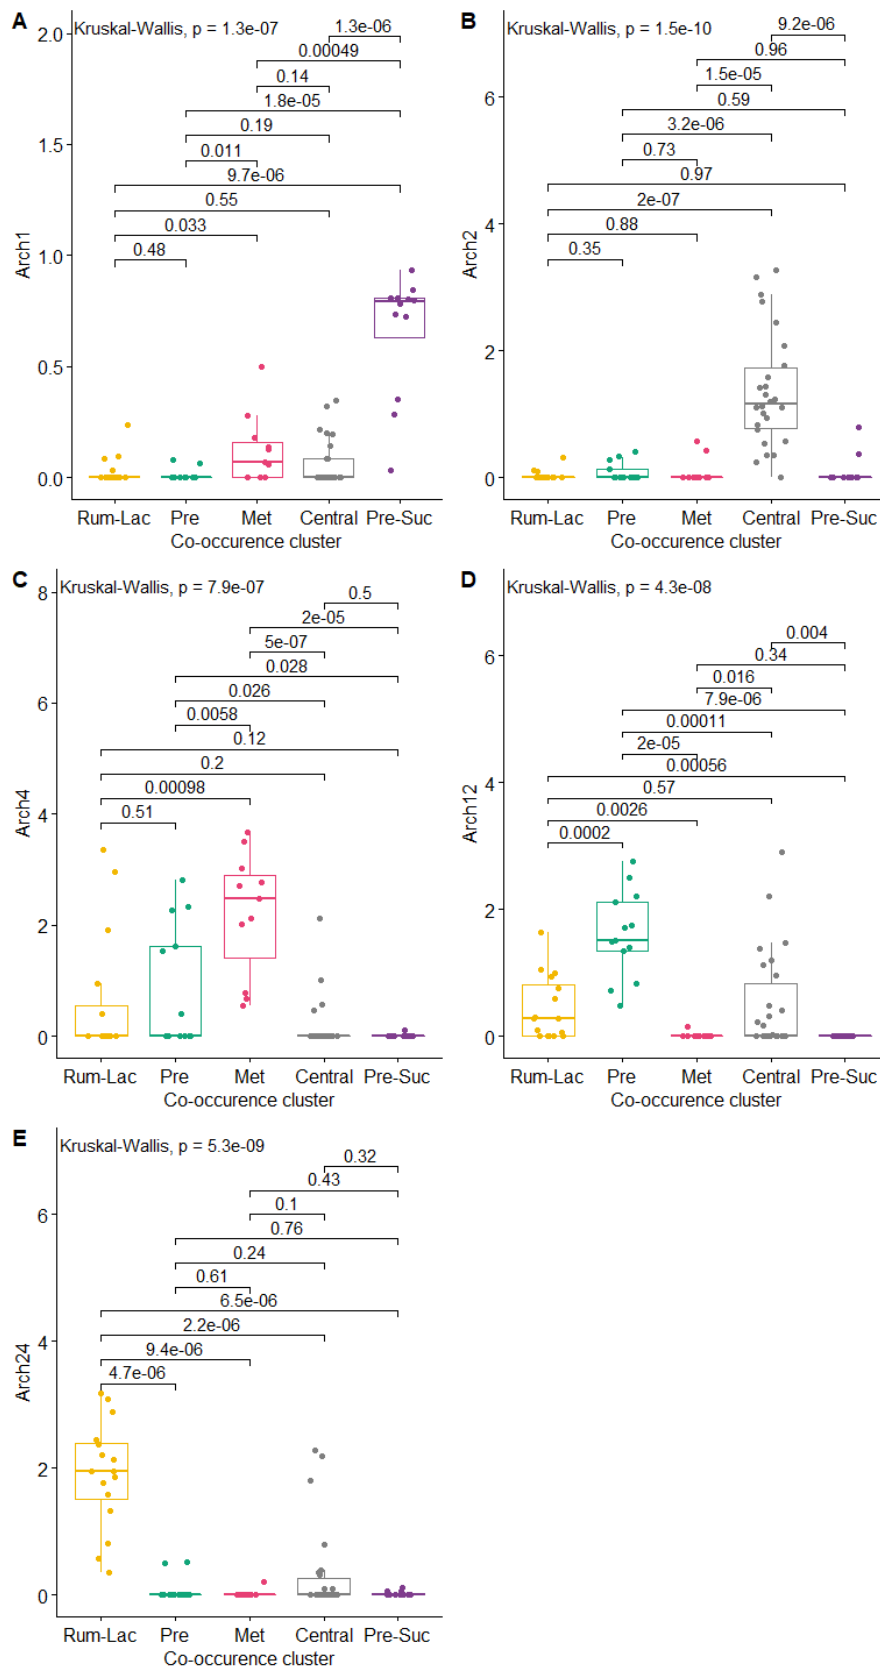

**Figure S6.** Box plot for values of archetype components Arch 1, 2, 4,12 and 24 (A to E, respectively) values for ASVs in the five co-occurrence clusters.

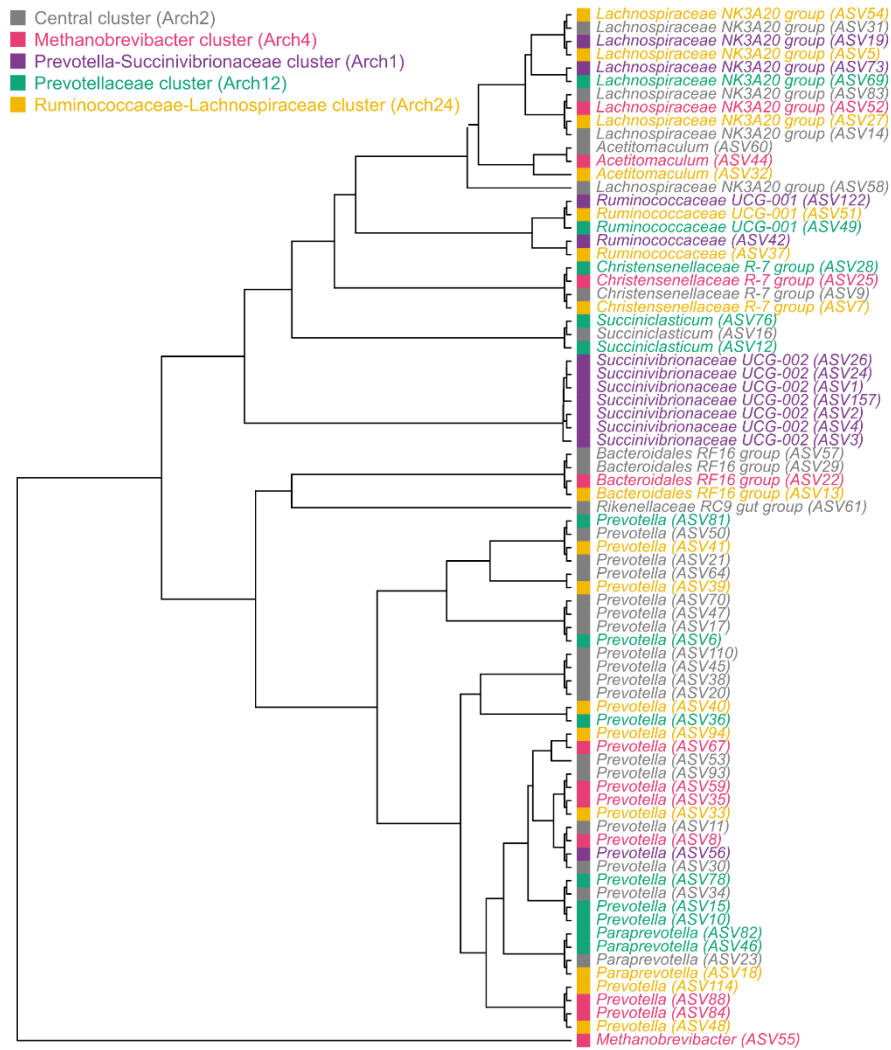

**Figure S7.** Phylogenetic tree of 16S rRNA amplicon based ASVs annotated with the taxonomical names. The colored groups match the modules of the co-occurrence network in Figure 5.



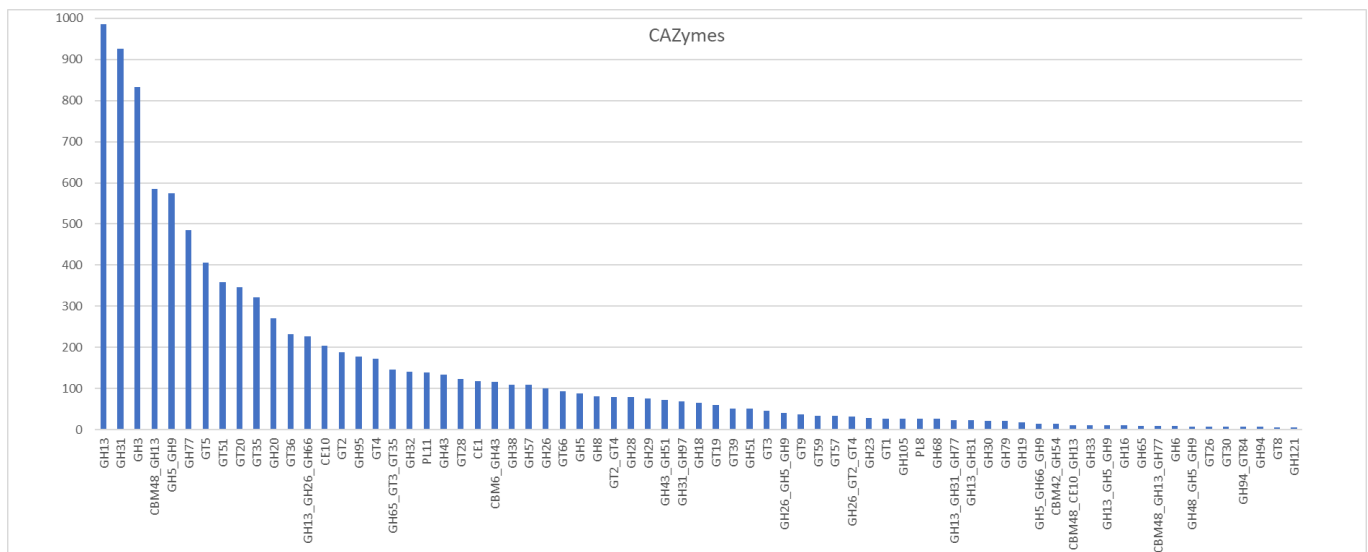

**Figure S8.** Bar chart presenting the abundances of CAZy families in the total data set, calculated as the average abundance across all samples and sorted from to most abundant to the least abundant.

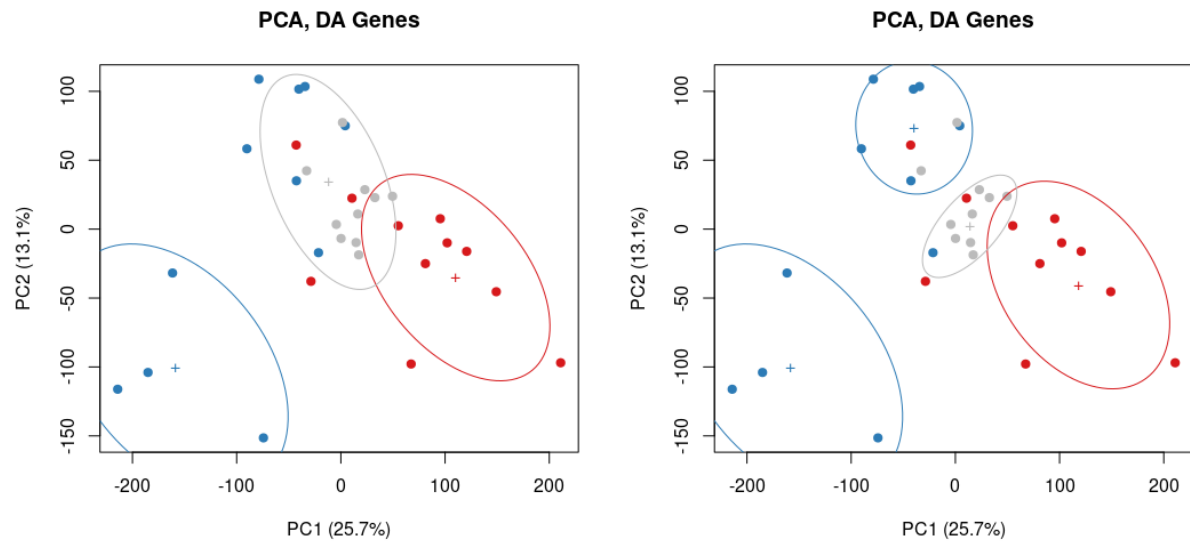

**Figure S9.** Scatterplot of first two principal components for the differentially abundant (DA) genes. Explained variance per component is indicated in the axes-labels. Red dots indicate L-REI samples, blue ones H-REI samples and the gray ones the intermediate samples. Two different k-mean classifications have been applied, k=3 (left) and k=4 (right) to indicate possible groupings. Ellipses represent the covariance matrices of each cluster with respect to their center, indicated with '+'.

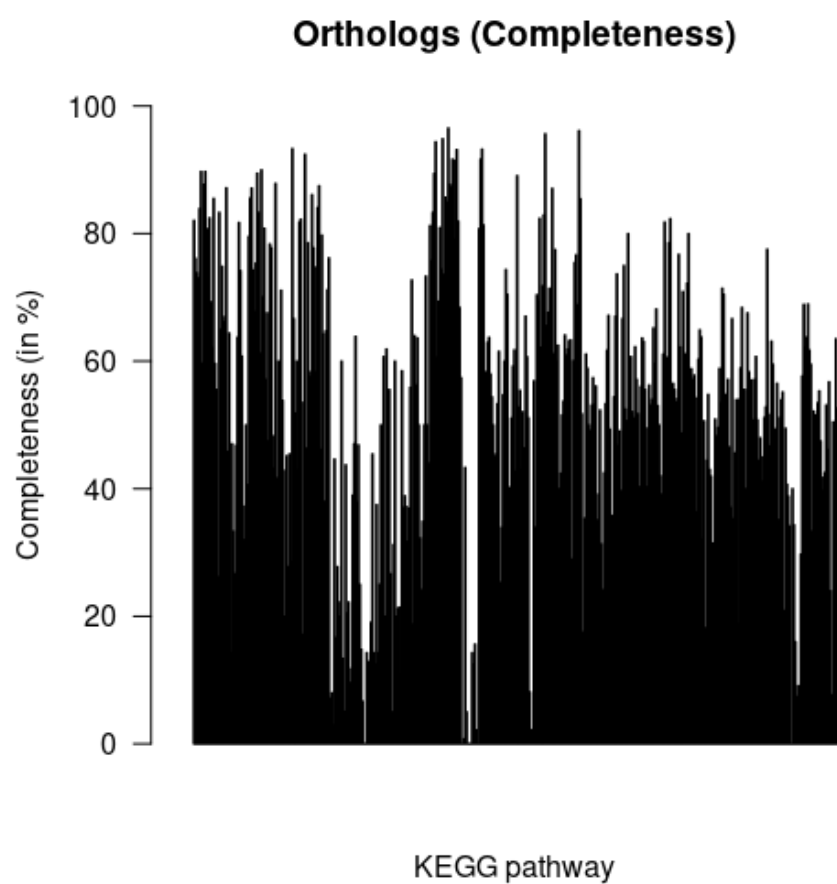

**Figure S10.** Completeness of detected KEGG pathways. KEGG pathways are sorted on the x-axis, and y-axis indicates the completeness between 0 and 100%, based on identified KEGG Orthologs from in-silico gene predictions and EggNOG annotations.

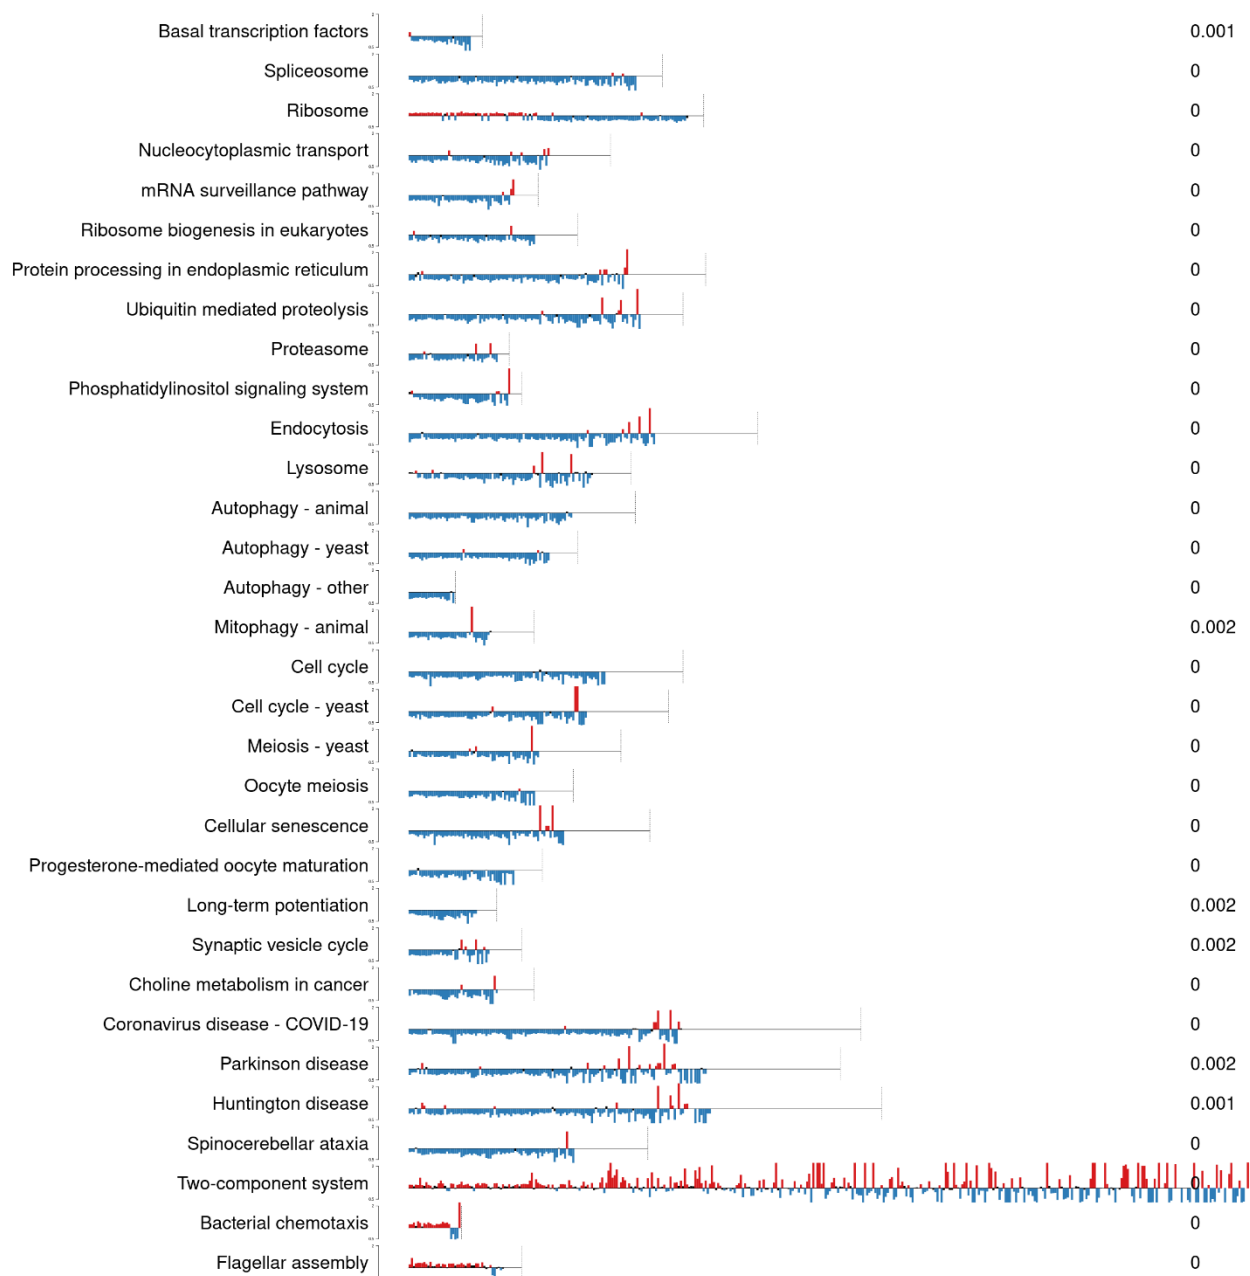

**Figure S11.** Visualization of the KO-wise abundance ratio between the L-REI (red) and H-REI (blue) groups within each significant pathway. Each row represents a pathway, each bar a KO, the line represents the total set of pathway orthologs showing here also the detected completeness of tested pathways. The p-values given in the last column. Y-axes are all fixed between 0.5 and 2.





**Table S3.** Abundances of KEGG functional categories in L-REI and H-REI groups.

| Level 1                              | Level 2                                     | L-REI       | H-REI       |
|--------------------------------------|---------------------------------------------|-------------|-------------|
| Cellular Processes                   | Cellular community - prokaryotes            | 0.017130364 | 0.015489674 |
| Cellular Processes                   | Cell motility                               | 0.00399166  | 0.004184261 |
| Cellular Processes                   | Cell growth and death                       | 0.026899723 | 0.030919793 |
| Cellular Processes                   | Transport and catabolism                    | 0.024845639 | 0.031490869 |
| Cellular Processes                   | Cellular community - eukaryotes             | 0.009146255 | 0.012032616 |
| Environmental Information Processing | Membrane transport                          | 0.018809359 | 0.017593917 |
| Environmental Information Processing | Signal transduction                         | 0.069837588 | 0.086692054 |
| Environmental Information Processing | Signaling molecules and interaction         | 0.000118248 | 0.000141923 |
| Genetic Information Processing       | Translation                                 | 0.02551893  | 0.025520267 |
| Genetic Information Processing       | Folding sorting and degradation             | 0.020256588 | 0.021273769 |
| Genetic Information Processing       | Transcription                               | 0.004949323 | 0.005258751 |
| Genetic Information Processing       | Replication and repair                      | 0.037823102 | 0.034519701 |
| Metabolism                           | Carbohydrate metabolism                     | 0.095035705 | 0.086173448 |
| Metabolism                           | Lipid metabolism                            | 0.017918707 | 0.016871767 |
| Metabolism                           | Metabolism of cofactors and vitamins        | 0.025708803 | 0.022989969 |
| Metabolism                           | Energy metabolism                           | 0.032827458 | 0.029540102 |
| Metabolism                           | Amino acid metabolism                       | 0.050532389 | 0.044615054 |
| Metabolism                           | Nucleotide metabolism                       | 0.040765731 | 0.037261803 |
| Metabolism                           | Biosynthesis of other secondary metabolites | 0.01274835  | 0.011230431 |
| Metabolism                           | Metabolism of terpenoids and polyketides    | 0.006241103 | 0.005555743 |
| Metabolism                           | Xenobiotics biodegradation and metabolism   | 0.005986598 | 0.005549583 |
| Metabolism                           | Metabolism of other amino acids             | 0.009966025 | 0.008931411 |
| Metabolism                           | Glycan biosynthesis and metabolism          | 0.018371988 | 0.016713928 |
| Metabolism                           | Global and overview maps                    | 0.284146639 | 0.25430495  |
| Organismal Systems                   | Endocrine system                            | 0.047014076 | 0.058068726 |
| Organismal Systems                   | Immune system                               | 0.016006097 | 0.019950162 |
| Organismal Systems                   | Aging                                       | 0.010179524 | 0.012309653 |
| Organismal Systems                   | Circulatory system                          | 0.006116842 | 0.008069772 |
| Organismal Systems                   | Development and regeneration                | 0.002186447 | 0.002863468 |
| Organismal Systems                   | Environmental adaptation                    | 0.015005655 | 0.018684685 |
| Organismal Systems                   | Nervous system                              | 0.02004027  | 0.025012429 |
| Organismal Systems                   | Sensory system                              | 0.007566959 | 0.009912256 |

|                    |                  |             |             |
|--------------------|------------------|-------------|-------------|
| Organismal Systems | Excretory system | 0.004106157 | 0.005282397 |
| Organismal Systems | Digestive system | 0.012201699 | 0.014990671 |
